# Supplementary material for: Differences in Response by Immunosuppressed Kidney Transplant Patients to Moderna mRNA-1273 versus Pfizer-BioNTech
Source: Preprints.org preprint supplement (doi:10.20944/preprints202310.1156.v1), 2023-10-19
Supplement: Supplementary file 5 [file Unprocessed data.xlsx]

## Sheet: readme
Sample	Cohort
C19-004	6 mo
C19-006	6 mo
C19-013	6 mo
C19-016	6 mo
C19-017	6 mo
C19-018	6 mo
C19-021	6 mo
C19-022	6 mo
C19-023	6 mo
C19-024	6 mo
C19-027	6 mo
C19-028	6 mo
C19-029	6 mo
C19-031	6 mo
C19-032	6 mo
C19-035	6 mo
C19-036	6 mo
C19-040	6 mo
C19-042	6 mo
C19-043	6 mo
C19-044	6 mo
C19-045	6 mo
C19-047	6 mo
C19-048	6 mo
C19-049	6 mo
C19-054	6 mo
C19-055	6 mo
C19-058	6 mo
C19-066	6 mo
C19-067	6 mo
C19-072	6 mo
C19-073	6 mo
C19-075	6 mo
C19-076	6 mo
C19-077	6 mo
C19-079	6 mo
C19-081	6 mo
C19-084	6 mo
C19-085	6 mo
C19-086	6 mo
C19-094	6 mo
C19-095	6 mo
C19-097	6 mo
C19-100	6 mo
C19-106	6 mo
C19-108	6 mo
C19-112	6 mo
C19-113	6 mo
C19-120	6 mo
C19-129	6 mo
C19-130	6 mo
C19-131	6 mo
C19-135	6 mo
C19-139	6 mo
C19-140	6 mo
C19-145	6 mo
C19-146	6 mo
C19-150	6 mo
C19-161	6 mo
C19-162	6 mo
C19-176	6 mo
C19-177	6 mo
C19-182	6 mo
C19-190	6 mo
C19-193	6 mo
C19-196	6 mo
C19-197	6 mo
C19-201	6 mo
C19-205	6 mo
C19-210	6 mo
C19-213	6 mo
C19-214	6 mo
C19-229	6 mo
C19-238	6 mo
C19-239	6 mo
C19-240	6 mo
C19-241	6 mo
C19-246	6 mo
C19-251	6 mo
C19-254	6 mo
C19-258	6 mo
C19-261	6 mo
C19-263	6 mo
C19-268	6 mo
C19-269	6 mo
C19-270	6 mo
C19-272	6 mo
C19-274	6 mo
C19-276	6 mo
C19-278	6 mo
C19-279	6 mo
C19-280	6 mo
C19-283	6 mo
C19-284	6 mo
C19-285	6 mo
C19-286	6 mo
C19-290	6 mo
C19-293	6 mo
C19-296	6 mo
C19-250	12 mo
C19-116	12 mo
C19-124	12 mo
C19-164	12 mo
C19-248	12 mo
C19-123	12 mo
C19-127	12 mo
C19-206	12 mo
C19-211	12 mo
C19-163	12 mo
C19-249	12 mo
C19-192	12 mo
C19-143	12 mo
C19-152	12 mo
C19-154	12 mo
C19-155	12 mo
C19-209	12 mo
C19-221	12 mo
C19-218	12 mo
C19-219	12 mo
C19-165	12 mo
C19-180	12 mo
C19-181	12 mo
C19-215	12 mo
C19-216	12 mo
C19-220	12 mo
C19-144	12 mo
C19-147	12 mo
C19-148	12 mo
C19-149	12 mo
C19-153	12 mo
C19-159	12 mo
C19-243	12 mo
C19-183	12 mo
C19-184	12 mo
C19-185	12 mo
C19-186	12 mo
C19-224	12 mo
C19-282	12 mo
C19-061	12 mo
C19-059	12 mo
C19-160	12 mo
C19-087	12 mo
C19-089	12 mo
C19-292	12 mo
C19-012	12 mo
C19-101	12 mo
C19-096	12 mo
C19-118	12 mo
C19-107	12 mo
C19-125	12 mo
C19-122	12 mo
C19-134	12 mo
C19-069	12 mo
C19-172	12 mo
C19-071	12 mo
C19-098	12 mo
C19-102	12 mo
C19-109	12 mo
C19-253	12 mo
C19-121	12 mo
C19-138	12 mo
C19-080	12 mo
C19-237	12 mo
C19-194	12 mo
C19-291	12 mo

## Sheet: igg elisa
Sample	OD	Concentration	Call	Group	Vaccine	Race	Sex	Had_COVID	doses	FromVacctoDOC2	Cohort
C19-116	2.269	64818.7	P	HC	Moderna	Caucasian	F	N	2	Over 6 months	12 mo
C19-123	1.977	51058.6	I	HC	Moderna	Caucasian	M	N	2	Over 6 months	12 mo
C19-124	1.085	22022.4	N	HC	Moderna	Caucasian	M	N	2	Over 6 months	12 mo
C19-127	1.537	34805.3	N	HC	Moderna	Caucasian	M	N	2	Over 6 months	12 mo
C19-143	0.635	7769.22	N	HC	Moderna	Caucasian	F	N	2	Over 6 months	12 mo
C19-144	1.422	20696	N	HC	Moderna	Caucasian	M	N	2	Over 6 months	12 mo
C19-147	2.066	36613.7	I	HC	Moderna	Caucasian	F	N	2	Over 6 months	12 mo
C19-148	3.145	89491.6	P	HC	Moderna	Asian	M	N	2	Over 6 months	12 mo
C19-149	1.287	18063.9	N	HC	Moderna	Caucasian	F	N	2	Over 6 months	12 mo
C19-152	3.082	84682.3	P	HC	Moderna	Caucasian	F	N	2	Over 6 months	12 mo
C19-153	2.46	50502.5	I	HC	Moderna	Caucasian	F	N	2	Over 6 months	12 mo
C19-154	1.95	100453	P	HC	Moderna	Caucasian	F	N	2	Over 6 months	12 mo
C19-155	2.973	320575	P	HC	Moderna	Caucasian	F	N	2	Over 6 months	12 mo
C19-159	2.457	170461	P	HC	Moderna	Caucasian	F	N	2	Over 6 months	12 mo
C19-163	2.271	139631	P	HC	Moderna	Caucasian	F	N	2	Over 6 months	12 mo
C19-164	0.346	6174.94	N	HC	Moderna	Caucasian	F	N	2	Over 6 months	12 mo
C19-165	0.449	7963.55	N	HC	Moderna	Caucasian	F	N	2	Over 6 months	12 mo
C19-180	2.355	65273.9	P	HC	Moderna	Caucasian	F	N	2	Over 6 months	12 mo
C19-183	0.12	2492.96	N	HC	Moderna	Caucasian	F	N	2	Over 6 months	12 mo
C19-184	1.519	32681.3	N	HC	Moderna	Caucasian	F	N	2	Over 6 months	12 mo
C19-185	2.411	68154.9	P	HC	Moderna	Black or AFA	F	N	2	Over 6 months	12 mo
C19-186	1.057	20405.9	N	HC	Moderna	Caucasian	M	N	2	Over 6 months	12 mo
C19-206	0.772	18413.8	N	HC	Moderna	Caucasian	F	N	2	Over 6 months	12 mo
C19-215	1.358	40736.9	I	HC	Moderna	No data	M	N	2	Over 6 months	12 mo
C19-221	1.489	47623.6	I	HC	Moderna	No data	M	N	2	Over 6 months	12 mo
C19-224	1.034	27016.8	N	HC	Moderna	No data	M	N	2	Over 6 months	12 mo
C19-282	3.236	130916	P	HC	Moderna	Asian	F	N	2	Over 6 months	12 mo
C19-061	0.033	1988.94	N	TR	Moderna	Caucasian	F	N	2	Over 6 months	12 mo
C19-087	0.105	3630.46	N	TR	Moderna	Caucasian	M	N	2	Over 6 months	12 mo
C19-253	1.333	27362.6	N	TR	Moderna	Black or AFA	F	N	2	Over 6 months	12 mo
C19-069	0.02	1718.63	N	TR	Moderna	Caucasian	M	N	1	Over 6 months	12 mo
C19-098	0.044	1552.87	N	TR	Moderna	Caucasian	M	N	2	Over 6 months	12 mo
C19-101	0.153	3274.2	N	TR	Moderna	Caucasian	F	N	2	Over 6 months	12 mo
C19-107	0.236	4648.24	N	TR	Moderna	Caucasian	F	N	2	Over 6 months	12 mo
C19-118	3.159	134768	P	TR	Moderna	Black or AFA	F	N	2	Over 6 months	12 mo
C19-125	0.93	18302.2	N	TR	Moderna	Caucasian	M	N	2	Over 6 months	12 mo
C19-134	0.12	1621.85	N	TR	Moderna	Caucasian	M	N	2	Over 6 months	12 mo
C19-138	3.273	100429	P	TR	Moderna	Black or AFA	M	N	2	Over 6 months	12 mo
C19-172	0.321	5742.7	N	TR	Moderna	Caucasian	F	N	2	Over 6 months	12 mo
C19-194	0.075	2082.9	N	TR	Moderna	Caucasian	m	N	2	Over 6 months	12 mo
C19-237	0.985	19568.2	N	TR	Moderna	Caucasian	M	N	2	Over 6 months	12 mo
C19-248	0.787	15102.5	N	HC	Pfizer	Caucasian	M	N	2	Over 6 months	12 mo
C19-249	3.08	125842	P	HC	Pfizer	Middle Eastern	F	N	2	Over 6 months	12 mo
C19-250	2.941	111781	P	HC	Pfizer	Caucasian	F	N	2	Over 6 months	12 mo
C19-181	0.948	17913.4	N	HC	Pfizer	Caucasian	M	N	2	Over 6 months	12 mo
C19-192	0.619	14121.8	N	HC	Pfizer	Caucasian	M	N	2	Over 6 months	12 mo
C19-209	0.447	9819.72	N	HC	Pfizer	Black or AFA	F	N	2	Over 6 months	12 mo
C19-211	1.582	53103.3	I	HC	Pfizer	Asian	F	N	2	Over 6 months	12 mo
C19-216	0.543	12153.4	N	HC	Pfizer	No data	M	N	2	Over 6 months	12 mo
C19-218	1.844	72105.6	P	HC	Pfizer	Caucasian	F	N	2	Over 6 months	12 mo
C19-219	0.95	24078.4	N	HC	Pfizer	Caucasian	M	N	2	Over 6 months	12 mo
C19-220	1.327	39271.6	I	HC	Pfizer	No data	M	N	2	Over 6 months	12 mo
C19-243	2.853	103887	P	HC	Pfizer	Middle Eastern	F	N	2	Over 6 months	12 mo
C19-012	0.009	1464.96	N	TR	Pfizer	Caucasian	M	N	2	Over 6 months	12 mo
C19-059	0.402	10809.5	N	TR	Pfizer	Black or AFA	F	N	2	Over 6 months	12 mo
C19-089	3.441	214088	P	TR	Pfizer	Caucasian	M	N	2	Over 6 months	12 mo
C19-292	2.822	116720	P	TR	Pfizer	Caucasian	F	N	3	Over 6 months	12 mo
C19-071	1.189	34831.8	N	TR	Pfizer	Caucasian	F	N	2	Over 6 months	12 mo
C19-080	0.383	10331.5	N	TR	Pfizer	Caucasian	M	N	2	Over 6 months	12 mo
C19-096	0.027	1294.14	N	TR	Pfizer	Middle Eastern	M	N	2	Over 6 months	12 mo
C19-102	3.241	144946	P	TR	Pfizer	Black or AFA	M	N	2	Over 6 months	12 mo
C19-109	0.018	1151.68	N	TR	Pfizer	Caucasian	M	N	2	Over 6 months	12 mo
C19-121	1.645	38392.7	I	TR	Pfizer	Caucasian	M	N	2	Over 6 months	12 mo
C19-122	0.197	4002.07	N	TR	Pfizer	Caucasian	M	N	2	Over 6 months	12 mo
C19-160	1.886	94113.6	P	TR	Pfizer	Caucasian	F	N	2	Over 6 months	12 mo
C19-291	3.02	134392	P	TR	Pfizer	Black or AFA	M	N	2	Over 6 months	12 mo
C19-246	3.441	174547	P	HC	Moderna	Asian	F	N	3	2-3 months	6 mo
C19-130	2.834	102303	P	HC	Moderna	Caucasian	F	N	2	3-6 months	6 mo
C19-145	3.463	120299	P	HC	Moderna	Caucasian	F	N	1	2-3 months	6 mo
C19-150	1.142	15477.5	N	HC	Moderna	Black or AFA	F	N	2	3-6 months	6 mo
C19-162	1.89	94535.1	P	HC	Moderna	Caucasian	F	N	2	2-3 months	6 mo
C19-176	3.454	157818	P	HC	Moderna	Caucasian	M	N	3	2-3 months	6 mo
C19-177	3.197	126655	P	HC	Moderna	Caucasian	F	N	3	2-3 months	6 mo
C19-190	2.928	101927	P	HC	Moderna	Middle Eastern	M	N	2	3-6 months	6 mo
C19-196	2.586	192097	P	HC	Moderna	Asian	M	N	3	0-1 months	6 mo
C19-279	3.032	110731	P	HC	Moderna	Caucasian	M	N	3	2-3 months	6 mo
C19-280	3.101	117135	P	HC	Moderna	Caucasian	F	N	3	3-6 months	6 mo
C19-283	2.702	85379.6	P	HC	Moderna	Caucasian	F	N	3	0-1 months	6 mo
C19-006	1.627	52614.3	I	TR	Moderna	Caucasian	M	N	2	3-6 months	6 mo
C19-017	2.808	131367	P	TR	Moderna	Caucasian	M	N	2	3-6 months	6 mo
C19-018	0.518	13852.5	N	TR	Moderna	Caucasian	F	N	2	3-6 months	6 mo
C19-023	-0.004	1192.67	N	TR	Moderna	Caucasian	M	N	2	3-6 months	6 mo
C19-024	0.672	18144.9	N	TR	Moderna	Caucasian	M	N	2	3-6 months	6 mo
C19-044	0.005	1374.79	N	TR	Moderna	Caucasian	M	N	3	0-1 months	6 mo
C19-075	1.471	45824.1	I	TR	Moderna	Black or AFA	m	N	2	2-3 months	6 mo
C19-084	3.441	214088	P	TR	Moderna	Caucasian	M	N	3	2-3 months	6 mo
C19-085	0.421	11293.8	N	TR	Moderna	Caucasian	M	N	2	3-6 months	6 mo
C19-263	2.298	62413.7	P	TR	Moderna	Black or AFA	M	N	2	2-3 months	6 mo
C19-268	1.429	30034.5	N	TR	Moderna	Caucasian	M	N	3	2-3 months	6 mo
C19-270	0.005	745.175	N	TR	Moderna	Caucasian	F	N	3	3-6 months	6 mo
C19-285	2.603	79075.3	P	TR	Moderna	Caucasian	M	N	3	3-6 months	6 mo
C19-293	2.209	75067.7	P	TR	Moderna	Caucasian	F	N	3	2-3 months	6 mo
C19-032	0.755	20560.1	N	TR	Moderna	Black or AFA	M	N	2	3-6 months	6 mo
C19-040	1.288	38539.1	N	TR	Moderna	Caucasian	M	N	2	3-6 months	6 mo
C19-043	2.648	116619	P	TR	Moderna	Caucasian	F	N	3	0-1 months	6 mo
C19-048	3.441	214088	P	TR	Moderna	Caucasian	M	N	3	0-1 months	6 mo
C19-049	3.441	214088	P	TR	Moderna	Black or AFA	M	N	2	2-3 months	6 mo
C19-054	3.05	157507	P	TR	Moderna	Black or AFA	M	N	2	3-6 months	6 mo
C19-055	1.119	32331.1	N	TR	Moderna	Caucasian	F	N	3	0-1 months	6 mo
C19-073	0.124	4063.54	N	TR	Moderna	Caucasian	M	N	3	2-3 months	6 mo
C19-079	3.441	214088	P	TR	Moderna	Caucasian	F	N	2	3-6 months	6 mo
C19-081	2.902	140909	P	TR	Moderna	Caucasian	M	N	3	2-3 months	6 mo
C19-106	3.441	174547	P	TR	Moderna	Middle Eastern	M	N	3	2-3 months	6 mo
C19-108	3.441	174547	P	TR	Moderna	Caucasian	F	N	3	2-3 months	6 mo
C19-112	0.384	7207.92	N	TR	Moderna	Caucasian	F	N	3	2-3 months	6 mo
C19-129	2.366	70054.2	P	TR	Moderna	Caucasian	M	N	3	2-3 months	6 mo
C19-131	1.345	19165.4	N	TR	Moderna	Caucasian	F	N	3	2-3 months	6 mo
C19-140	3.463	120299	P	TR	Moderna	Caucasian	F	N	3	2-3 months	6 mo
C19-193	2.003	87027	P	TR	Moderna	Caucasian	M	N	3	3-6 months	6 mo
C19-197	0.011	919.951	N	TR	Moderna	Middle Eastern	M	N	2	3-6 months	6 mo
C19-238	0.371	6979.96	N	TR	Moderna	Caucasian	M	N	3	2-3 months	6 mo
C19-241	0.756	14451.3	N	TR	Moderna	Caucasian	F	N	2	3-6 months	6 mo
C19-272	2.394	67277.2	P	TR	Moderna	Caucasian	F	N	3	2-3 months	6 mo
C19-276	3.038	111266	P	TR	Moderna	Black or AFA	M	N	4	0-1 months	6 mo
C19-278	3.019	109617	P	TR	Moderna	Black or AFA	F	N	3	3-6 months	6 mo
C19-251	3.441	174547	P	HC	Pfizer	Asian	M	N	3	2-3 months	6 mo
C19-258	3.442	156181	P	HC	Pfizer	Black or AFA	M	N	2	0-1 months	6 mo
C19-261	3.103	117259	P	HC	Pfizer	Caucasian	F	N	3	0-1 months	6 mo
C19-269	2.885	98506.7	P	HC	Pfizer	Black or AFA	F	N	3	2-3 months	6 mo
C19-095	3.441	174547	P	HC	Pfizer	Black or AFA	F	N	2	3-6 months	6 mo
C19-146	3.463	120299	P	HC	Pfizer	Caucasian	F	N	2	2-3 months	6 mo
C19-161	1.267	48925.6	I	HC	Pfizer	Caucasian	F	N	2	3-6 months	6 mo
C19-182	2.915	100923	P	HC	Pfizer	Caucasian	M	N	3	2-3 months	6 mo
C19-205	0.112	2760.74	N	HC	Pfizer	Caucasian	M	N	3	0-1 months	6 mo
C19-210	1.28	37095.2	N	HC	Pfizer	Caucasian	F	N	2	3-6 months	6 mo
C19-213	2.202	111352	P	HC	Pfizer	Black or AFA	M	N	3	0-1 months	6 mo
C19-214	2.668	220108	P	HC	Pfizer	No data	M	N	3	2-3 months	6 mo
C19-229	0.238	4683.43	N	HC	Pfizer	Caucasian	F	N	1	0-1 months	6 mo
C19-274	0.916	17209.3	N	HC	Pfizer	Black or AFA	M	N	3	3-6 months	6 mo
C19-284	0.233	4288.9	N	HC	Pfizer	Caucasian	F	N	3	0-1 months	6 mo
C19-004	0.289	7977.32	N	TR	Pfizer	Caucasian	M	N	3	0-1 months	6 mo
C19-013	-0.007	1113.85	N	TR	Pfizer	Caucasian	M	N	2	3-6 months	6 mo
C19-021	-0.003	1216.77	N	TR	Pfizer	Black or AFA	F	N	2	2-3 months	6 mo
C19-022	3.342	197626	P	TR	Pfizer	Caucasian	F	N	3	2-3 months	6 mo
C19-028	2.561	109320	P	TR	Pfizer	Black or AFA	M	N	2	3-6 months	6 mo
C19-029	3.385	204574	P	TR	Pfizer	Middle Eastern	M	N	2	2-3 months	6 mo
C19-031	0.427	11443.9	N	TR	Pfizer	Black or AFA	M	N	3	0-1 months	6 mo
C19-035	0.007	1420.96	N	TR	Pfizer	Caucasian	F	N	2	3-6 months	6 mo
C19-036	0.005	1374.79	N	TR	Pfizer	Caucasian	M	N	2	3-6 months	6 mo
C19-042	0.022	1762.86	N	TR	Pfizer	Hispanic	M	N	2	3-6 months	6 mo
C19-058	2.111	77914.4	P	TR	Pfizer	Caucasian	M	N	2	3-6 months	6 mo
C19-077	3.343	169943	P	TR	Pfizer	Caucasian	F	N	3	2-3 months	6 mo
C19-086	0.046	2296.21	N	TR	Pfizer	Hispanic	M	N	3	2-3 months	6 mo
C19-254	0.018	938.631	N	TR	Pfizer	Caucasian	F	N	1	2-3 months	6 mo
C19-286	0.586	14145.3	N	TR	Pfizer	Caucasian	M	N	3	3-6 months	6 mo
C19-290	3.261	160018	P	TR	Pfizer	Caucasian	M	N	2	2-3 months	6 mo
C19-296	2.204	74812.5	P	TR	Pfizer	Caucasian	M	N	3	3-6 months	6 mo
C19-016	0.992	28009.9	N	TR	Pfizer	Caucasian	M	N	3	2-3 months	6 mo
C19-027	1.882	65092.7	P	TR	Pfizer	Caucasian	F	N	2	3-6 months	6 mo
C19-045	-0.008	1098.54	N	TR	Pfizer	Black or AFA	F	N	2	3-6 months	6 mo
C19-047	1.833	62550.9	P	TR	Pfizer	Caucasian	M	N	2	3-6 months	6 mo
C19-066	2.108	77716.3	P	TR	Pfizer	Black or AFA	F	N	1	0-1 months	6 mo
C19-067	0.118	3918.83	N	TR	Pfizer	Caucasian	M	N	3	2-3 months	6 mo
C19-072	0.821	22565.7	N	TR	Pfizer	Black or AFA	M	N	2	3-6 months	6 mo
C19-076	0.006	1401.17	N	TR	Pfizer	Black or AFA	M	N	1	2-3 months	6 mo
C19-094	3.441	174547	P	TR	Pfizer	Black or AFA	M	N	2	3-6 months	6 mo
C19-097	0.065	1888.16	N	TR	Pfizer	Caucasian	F	N	3	2-3 months	6 mo
C19-100	1.087	22054.9	N	TR	Pfizer	Middle Eastern	M	N	2	3-6 months	6 mo
C19-113	0.037	1451.02	N	TR	Pfizer	Caucasian	M	N	2	3-6 months	6 mo
C19-120	-0.003	844.101	N	TR	Pfizer	Hispanic	M	N	2	2-3 months	6 mo
C19-135	2.561	54817.4	P	TR	Pfizer	Caucasian	F	N	3	2-3 months	6 mo
C19-139	0.069	1082.01	N	TR	Pfizer	Caucasian	M	N	3	2-3 months	6 mo
C19-201	2.17	106934	P	TR	Pfizer	Caucasian	M	N	3	2-3 months	6 mo
C19-239	2.619	85843.4	P	TR	Pfizer	Middle Eastern	M	N	3	3-6 months	6 mo
C19-240	0.138	3045.3	N	TR	Pfizer	Black or AFA	M	N	3	3-6 months	6 mo

## Sheet: elispot il2 and tnfa
Assay	Well	Patient	Draw	Group	Vaccine	Had_COVID	Igg (Nov)	Stimulation	Cells/well, thousands	IL-2 total	TNFa total	Double-Color	Race	Gender	Age	IgG concentration
136	A1	C19-076	B, V	TR	Pfizer	N	Negative	No stimulation	50	2	25	0	Black or AFA	M	40.8055	1312.65
136	A3	C19-076	B, V	TR	Pfizer	N	Negative	No stimulation	50	8	12	0	Black or AFA	M	40.8055	1312.65
136	A7	C19-076	B, V	TR	Pfizer	N	Negative	LPS	50	1	932	0	Black or AFA	M	40.8055	1312.65
136	A5	C19-076	B, V	TR	Pfizer	N	Negative	LPS	50	4	665	2	Black or AFA	M	40.8055	1312.65
136	A11	C19-076	B, V	TR	Pfizer	N	Negative	PHA-P	50	59	605	14	Black or AFA	M	40.8055	1312.65
136	A9	C19-076	B, V	TR	Pfizer	N	Negative	PHA-P	50	76	877	26	Black or AFA	M	40.8055	1312.65
124	E1	C19-230	B	TR	Covid +	No data	No data	LPS	50	0	214	0	Caucasian	M	59.0986	1353.44
124	E2	C19-230	B	TR	Covid +	No data	No data	LPS	50	0	42	0	Caucasian	M	59.0986	1353.44
124	E3	C19-230	B	TR	Covid +	No data	No data	PMA	50	0	32	0	Caucasian	M	59.0986	1353.44
124	E4	C19-230	B	TR	Covid +	No data	No data	PMA	50	0	2	0	Caucasian	M	59.0986	1353.44
124	E5	C19-230	B	TR	Covid +	No data	No data	IO	50	0	65	0	Caucasian	M	59.0986	1353.44
124	E6	C19-230	B	TR	Covid +	No data	No data	IO	50	0	0	0	Caucasian	M	59.0986	1353.44
124	E7	C19-230	B	TR	Covid +	No data	No data	PHA-P	50	0	48	0	Caucasian	M	59.0986	1353.44
124	E8	C19-230	B	TR	Covid +	No data	No data	PHA-P	50	0	25	0	Caucasian	M	59.0986	1353.44
124	E9	C19-230	B	TR	Covid +	No data	No data	PMA	50	0	61	0	Caucasian	M	59.0986	1353.44
124	E10	C19-230	B	TR	Covid +	No data	No data	PHA-P	50	0	10	0	Caucasian	M	59.0986	1353.44
124	E11	C19-230	B	TR	Covid +	No data	No data	No stimulation	50	0	0	0	Caucasian	M	59.0986	1353.44
124	E12	C19-230	B	TR	Covid +	No data	No data	No stimulation	50	0	0	0	Caucasian	M	59.0986	1353.44
124	D2	C19-157	B	TR	Pfizer	N	Negative	LPS	50	0	809	0	Black or AFA	M	69.0274	2142.39
124	D1	C19-157	B	TR	Pfizer	N	Negative	LPS	50	9	1063	4	Black or AFA	M	69.0274	2142.39
124	D3	C19-157	B	TR	Pfizer	N	Negative	PMA	50	1	310	0	Black or AFA	M	69.0274	2142.39
124	D4	C19-157	B	TR	Pfizer	N	Negative	PMA	50	0	27	0	Black or AFA	M	69.0274	2142.39
124	D5	C19-157	B	TR	Pfizer	N	Negative	IO	50	0	310	0	Black or AFA	M	69.0274	2142.39
124	D6	C19-157	B	TR	Pfizer	N	Negative	IO	50	0	2	0	Black or AFA	M	69.0274	2142.39
124	D8	C19-157	B	TR	Pfizer	N	Negative	PHA-P	50	0	653	0	Black or AFA	M	69.0274	2142.39
124	D9	C19-157	B	TR	Pfizer	N	Negative	PMA	50	0	187	0	Black or AFA	M	69.0274	2142.39
124	D10	C19-157	B	TR	Pfizer	N	Negative	PHA-P	50	0	872	0	Black or AFA	M	69.0274	2142.39
124	D11	C19-157	B	TR	Pfizer	N	Negative	No stimulation	50	0	371	0	Black or AFA	M	69.0274	2142.39
124	D12	C19-157	B	TR	Pfizer	N	Negative	No stimulation	50	0	20	0	Black or AFA	M	69.0274	2142.39
124	D7	C19-157	B	TR	Pfizer	N	Negative	PHA-P	50	2	1196	2	Black or AFA	M	69.0274	2142.39
118	H11	C19-208	B	HC	Covid +	No data	No data	No stimulation	50	5	168	0	Caucasian	F	61.8685	7473
118	H2	C19-208	B	HC	Covid +	No data	No data	LPS	50	15	1163	8	Caucasian	F	61.8685	7473
118	H5	C19-208	B	HC	Covid +	No data	No data	PMA	50	28	1511	17	Caucasian	F	61.8685	7473
118	H8	C19-208	B	HC	Covid +	No data	No data	IO	50	135	1032	54	Caucasian	F	61.8685	7473
124	C3	C19-093	B	TR	Pfizer	N	Weak signal	PMA	50	0	330	0	Caucasian	M	83.074	8821.45
124	C4	C19-093	B	TR	Pfizer	N	Weak signal	PMA	50	0	91	0	Caucasian	M	83.074	8821.45
124	C6	C19-093	B	TR	Pfizer	N	Weak signal	IO	50	0	628	0	Caucasian	M	83.074	8821.45
124	C7	C19-093	B	TR	Pfizer	N	Weak signal	PHA-P	50	0	1213	0	Caucasian	M	83.074	8821.45
124	C9	C19-093	B	TR	Pfizer	N	Weak signal	PMA	50	0	89	0	Caucasian	M	83.074	8821.45
124	C11	C19-093	B	TR	Pfizer	N	Weak signal	No stimulation	50	0	259	0	Caucasian	M	83.074	8821.45
124	C12	C19-093	B	TR	Pfizer	N	Weak signal	No stimulation	50	0	110	0	Caucasian	M	83.074	8821.45
154	D7	C19-157	C	TR	Pfizer	N	Negative	LPS	50	0	0	0	Black or AFA	M	69.0274	3952.52
154	E7	C19-157	C	TR	Pfizer	N	Negative	LPS	50	0	0	0	Black or AFA	M	69.0274	3952.52
124	C5	C19-093	B	TR	Pfizer	N	Weak signal	IO	50	2	104	1	Caucasian	M	83.074	8821.45
124	C8	C19-093	B	TR	Pfizer	N	Weak signal	PHA-P	50	1	1445	1	Caucasian	M	83.074	8821.45
124	C10	C19-093	B	TR	Pfizer	N	Weak signal	PHA-P	50	1	1390	1	Caucasian	M	83.074	8821.45
118	B11	C19-153	B, V	HC	Moderna	N	Positive	No stimulation	50	1	243	0	Caucasian	F	41.4849	32223.3
118	B2	C19-153	B, V	HC	Moderna	N	Positive	LPS	50	1	819	1	Caucasian	F	41.4849	32223.3
118	B5	C19-153	B, V	HC	Moderna	N	Positive	PMA	50	8	954	2	Caucasian	F	41.4849	32223.3
118	B8	C19-153	B, V	HC	Moderna	N	Positive	IO	50	86	515	8	Caucasian	F	41.4849	32223.3
136	E1	C19-219	B	HC	Pfizer	N	No data	No stimulation	50	4	21	0	Caucasian	M	121.97	34586
136	E3	C19-219	B	HC	Pfizer	N	No data	No stimulation	50	2	35	0	Caucasian	M	121.97	34586
124	G1	C19-263	B	TR	Moderna	N	No data	LPS	50	1	1000	0	Black or AFA	M	42.9205	72772.1
124	G2	C19-263	B	TR	Moderna	N	No data	LPS	50	0	1046	0	Black or AFA	M	42.9205	72772.1
136	E11	C19-219	B	HC	Pfizer	N	No data	PHA-P	50	186	1007	57	Caucasian	M	121.97	34586
136	E9	C19-219	B	HC	Pfizer	N	No data	PHA-P	50	199	1058	69	Caucasian	M	121.97	34586
118	E5	C19-182	B	HC	Pfizer	N	No data	PMA	50	0	1399	0	Caucasian	M	25.0822	52044.1
118	E11	C19-182	B	HC	Pfizer	N	No data	No stimulation	50	9	506	1	Caucasian	M	25.0822	52044.1
136	D5	C19-213	B	HC	Pfizer	N	No data	LPS	50	1	885	0	Black or AFA	M	47.7918	158249
118	E8	C19-182	B	HC	Pfizer	N	No data	IO	50	71	1610	34	Caucasian	M	25.0822	52044.1
118	G2	C19-201	B, V	TR	Pfizer	N	No data	LPS	50	0	0	0	Caucasian	M	71.9753	69402.1
118	G11	C19-201	B, V	TR	Pfizer	N	No data	No stimulation	50	2	206	0	Caucasian	M	71.9753	69402.1
118	G8	C19-201	B, V	TR	Pfizer	N	No data	IO	50	15	752	4	Caucasian	M	71.9753	69402.1
118	G5	C19-201	B, V	TR	Pfizer	N	No data	PMA	50	21	978	18	Caucasian	M	71.9753	69402.1
136	D7	C19-213	B	HC	Pfizer	N	No data	LPS	50	4	880	0	Black or AFA	M	47.7918	158249
154	F7	C19-157	C	TR	Pfizer	N	Negative	LPS	50	0	0	0	Black or AFA	M	69.0274	3952.52
124	G3	C19-263	B	TR	Moderna	N	No data	PMA	50	0	1067	0	Black or AFA	M	42.9205	72772.1
124	G4	C19-263	B	TR	Moderna	N	No data	PMA	50	0	554	0	Black or AFA	M	42.9205	72772.1
124	G6	C19-263	B	TR	Moderna	N	No data	IO	50	0	43	0	Black or AFA	M	42.9205	72772.1
124	G7	C19-263	B	TR	Moderna	N	No data	PHA-P	50	0	1334	0	Black or AFA	M	42.9205	72772.1
124	G9	C19-263	B	TR	Moderna	N	No data	PMA	50	0	1079	0	Black or AFA	M	42.9205	72772.1
124	G10	C19-263	B	TR	Moderna	N	No data	PHA-P	50	0	1042	0	Black or AFA	M	42.9205	72772.1
124	G11	C19-263	B	TR	Moderna	N	No data	No stimulation	50	0	53	0	Black or AFA	M	42.9205	72772.1
124	G12	C19-263	B	TR	Moderna	N	No data	No stimulation	50	0	14	0	Black or AFA	M	42.9205	72772.1
124	G5	C19-263	B	TR	Moderna	N	No data	IO	50	2	1099	1	Black or AFA	M	42.9205	72772.1
124	G8	C19-263	B	TR	Moderna	N	No data	PHA-P	50	1	1214	1	Black or AFA	M	42.9205	72772.1
118	D11	C19-181	B, V	HC	Pfizer	N	No data	No stimulation	50	4	141	0	Caucasian	M	23.4082	98494.8
118	D5	C19-181	B, V	HC	Pfizer	N	No data	PMA	50	10	1556	2	Caucasian	M	23.4082	98494.8
118	D2	C19-181	B, V	HC	Pfizer	N	No data	LPS	50	14	1281	5	Caucasian	M	23.4082	98494.8
118	D8	C19-181	B, V	HC	Pfizer	N	No data	IO	50	114	819	30	Caucasian	M	23.4082	98494.8
136	C1	C19-192	B+	HC	Pfizer	N	No data	No stimulation	50	10	2	0	Caucasian	M	121.959	112817
136	C3	C19-192	B+	HC	Pfizer	N	No data	No stimulation	50	2	5	0	Caucasian	M	121.959	112817
136	C5	C19-192	B+	HC	Pfizer	N	No data	LPS	50	1	672	0	Caucasian	M	121.959	112817
136	C7	C19-192	B+	HC	Pfizer	N	No data	LPS	50	1	692	0	Caucasian	M	121.959	112817
136	C11	C19-192	B+	HC	Pfizer	N	No data	PHA-P	50	45	565	8	Caucasian	M	121.959	112817
136	C9	C19-192	B+	HC	Pfizer	N	No data	PHA-P	50	51	634	18	Caucasian	M	121.959	112817
136	D1	C19-213	B	HC	Pfizer	N	No data	No stimulation	50	2	101	0	Black or AFA	M	47.7918	158249
136	D3	C19-213	B	HC	Pfizer	N	No data	No stimulation	50	1	127	0	Black or AFA	M	47.7918	158249
154	D10	C19-276	B	TR	Moderna	N	No data	LPS	50	0	442	0	Black or AFA	M	54.1808	312466
154	E10	C19-276	B	TR	Moderna	N	No data	LPS	50	2	389	0	Black or AFA	M	54.1808	312466
136	D9	C19-213	B	HC	Pfizer	N	No data	PHA-P	50	144	887	47	Black or AFA	M	47.7918	158249
136	D11	C19-213	B	HC	Pfizer	N	No data	PHA-P	50	152	817	56	Black or AFA	M	47.7918	158249
136	D2	C19-299	B	TR	Moderna	Y	No data	No stimulation	50	3	5	0	Caucasian	M	67.7068	171492
136	D4	C19-299	B	TR	Moderna	Y	No data	No stimulation	50	5	8	0	Caucasian	M	67.7068	171492
136	D6	C19-299	B	TR	Moderna	Y	No data	LPS	50	1	914	0	Caucasian	M	67.7068	171492
136	D8	C19-299	B	TR	Moderna	Y	No data	LPS	50	1	879	0	Caucasian	M	67.7068	171492
136	H2	C19-299	B	TR	Moderna	Y	No data	No stimulation	50	6	2	0	Caucasian	M	67.7068	171492
136	H4	C19-299	B	TR	Moderna	Y	No data	No stimulation	50	3	6	0	Caucasian	M	67.7068	171492
136	H6	C19-299	B	TR	Moderna	Y	No data	LPS	50	3	753	0	Caucasian	M	67.7068	171492
136	H8	C19-299	B	TR	Moderna	Y	No data	LPS	50	2	907	0	Caucasian	M	67.7068	171492
136	D10	C19-299	B	TR	Moderna	Y	No data	PHA-P	50	14	892	3	Caucasian	M	67.7068	171492
136	D12	C19-299	B	TR	Moderna	Y	No data	PHA-P	50	22	451	3	Caucasian	M	67.7068	171492
136	H10	C19-299	B	TR	Moderna	Y	No data	PHA-P	50	18	848	6	Caucasian	M	67.7068	171492
136	H12	C19-299	B	TR	Moderna	Y	No data	PHA-P	50	24	484	10	Caucasian	M	67.7068	171492
154	F10	C19-276	B	TR	Moderna	N	No data	LPS	50	0	475	0	Black or AFA	M	54.1808	312466
154	E2	C19-031	B	TR	Pfizer	N	Negative	LPS	50	0	0	0	Black or AFA	M	74.063	11355
124	H3	C19-292	B	TR	Pfizer	N	No data	PMA	50	0	1	0	Caucasian	F	50.2932	174630
124	H4	C19-292	B	TR	Pfizer	N	No data	PMA	50	0	4	0	Caucasian	F	50.2932	174630
124	H5	C19-292	B	TR	Pfizer	N	No data	IO	50	0	8	0	Caucasian	F	50.2932	174630
124	H6	C19-292	B	TR	Pfizer	N	No data	IO	50	0	3	0	Caucasian	F	50.2932	174630
124	H8	C19-292	B	TR	Pfizer	N	No data	PHA-P	50	0	25	0	Caucasian	F	50.2932	174630
124	H9	C19-292	B	TR	Pfizer	N	No data	PMA	50	0	19	0	Caucasian	F	50.2932	174630
124	H10	C19-292	B	TR	Pfizer	N	No data	PHA-P	50	0	34	0	Caucasian	F	50.2932	174630
124	H11	C19-292	B	TR	Pfizer	N	No data	No stimulation	50	0	4	0	Caucasian	F	50.2932	174630
124	H12	C19-292	B	TR	Pfizer	N	No data	No stimulation	50	10	0	0	Caucasian	F	50.2932	174630
124	H7	C19-292	B	TR	Pfizer	N	No data	PHA-P	50	5	196	1	Caucasian	F	50.2932	174630
154	F2	C19-031	B	TR	Pfizer	N	Negative	LPS	50	0	0	0	Black or AFA	M	74.063	11355
154	D2	C19-031	B	TR	Pfizer	N	Negative	LPS	50	0	755	0	Black or AFA	M	74.063	11355
124	B3	C19-066	B	TR	Pfizer	N	Weak signal	PMA	50	0	631	0	Black or AFA	F	47.0493	187889
124	B4	C19-066	B	TR	Pfizer	N	Weak signal	PMA	50	0	148	0	Black or AFA	F	47.0493	187889
124	B6	C19-066	B	TR	Pfizer	N	Weak signal	IO	50	0	11	0	Black or AFA	F	47.0493	187889
124	B7	C19-066	B	TR	Pfizer	N	Weak signal	PHA-P	50	0	1247	0	Black or AFA	F	47.0493	187889
124	B8	C19-066	B	TR	Pfizer	N	Weak signal	PHA-P	50	0	765	0	Black or AFA	F	47.0493	187889
124	B9	C19-066	B	TR	Pfizer	N	Weak signal	PMA	50	0	860	0	Black or AFA	F	47.0493	187889
124	B10	C19-066	B	TR	Pfizer	N	Weak signal	PHA-P	50	0	623	0	Black or AFA	F	47.0493	187889
124	B11	C19-066	B	TR	Pfizer	N	Weak signal	No stimulation	50	0	84	0	Black or AFA	F	47.0493	187889
124	B12	C19-066	B	TR	Pfizer	N	Weak signal	No stimulation	50	0	4	0	Black or AFA	F	47.0493	187889
124	B5	C19-066	B	TR	Pfizer	N	Weak signal	IO	50	3	900	1	Black or AFA	F	47.0493	187889
124	F2	C19-257	B	TR	Johnson & Johnson	Y	No data	LPS	50	0	1103	0	Caucasian	M	64.726	229995
124	F3	C19-257	B	TR	Johnson & Johnson	Y	No data	PMA	50	0	269	0	Caucasian	M	64.726	229995
124	F4	C19-257	B	TR	Johnson & Johnson	Y	No data	PMA	50	0	57	0	Caucasian	M	64.726	229995
124	F5	C19-257	B	TR	Johnson & Johnson	Y	No data	IO	50	0	197	0	Caucasian	M	64.726	229995
124	F6	C19-257	B	TR	Johnson & Johnson	Y	No data	IO	50	0	18	0	Caucasian	M	64.726	229995
124	F7	C19-257	B	TR	Johnson & Johnson	Y	No data	PHA-P	50	0	1212	0	Caucasian	M	64.726	229995
124	F8	C19-257	B	TR	Johnson & Johnson	Y	No data	PHA-P	50	0	766	0	Caucasian	M	64.726	229995
124	F9	C19-257	B	TR	Johnson & Johnson	Y	No data	PMA	50	0	253	0	Caucasian	M	64.726	229995
124	F10	C19-257	B	TR	Johnson & Johnson	Y	No data	PHA-P	50	0	619	0	Caucasian	M	64.726	229995
124	F11	C19-257	B	TR	Johnson & Johnson	Y	No data	No stimulation	50	0	66	0	Caucasian	M	64.726	229995
124	F12	C19-257	B	TR	Johnson & Johnson	Y	No data	No stimulation	50	0	14	0	Caucasian	M	64.726	229995
124	F1	C19-257	B	TR	Johnson & Johnson	Y	No data	LPS	50	14	1433	7	Caucasian	M	64.726	229995
154	A10	C19-276	B	TR	Moderna	N	No data	No stimulation	50	1	102	0	Black or AFA	M	54.1808	312466
154	B10	C19-276	B	TR	Moderna	N	No data	No stimulation	50	1	70	0	Black or AFA	M	54.1808	312466
154	C10	C19-276	B	TR	Moderna	N	No data	No stimulation	50	1	73	0	Black or AFA	M	54.1808	312466
124	B2	C19-066	B	TR	Pfizer	N	Weak signal	LPS	50	0	995	0	Black or AFA	F	47.0493	187889
124	B1	C19-066	B	TR	Pfizer	N	Weak signal	LPS	50	1	1127	1	Black or AFA	F	47.0493	187889
124	A2	C19-007	C	TR	Pfizer	N	Negative	LPS	50	0	1075	0	Black or AFA	M	67.2274	777762
154	G10	C19-276	B	TR	Moderna	N	No data	PMA	50	11	42	1	Black or AFA	M	54.1808	312466
154	H10	C19-276	B	TR	Moderna	N	No data	PMA	50	12	74	1	Black or AFA	M	54.1808	312466
118	F11	C19-194	B	TR	Moderna	N	No data	No stimulation	50	3	47	0	Caucasian	m	59.1096	326995
124	A1	C19-007	C	TR	Pfizer	N	Negative	LPS	50	3	1132	2	Black or AFA	M	67.2274	777762
118	F5	C19-194	B	TR	Moderna	N	No data	PMA	50	14	1529	13	Caucasian	m	59.1096	326995
118	F8	C19-194	BB	TR	Moderna	N	No data	IO	50	59	1083	18	Caucasian	m	59.1096	326995
136	F1	C19-221	B+	HC	Moderna	N	No data	No stimulation	50	4	66	0	0	M	121.97	345207
136	F3	C19-221	B+	HC	Moderna	N	No data	No stimulation	50	4	140	0	0	M	121.97	345207
136	F5	C19-221	B+	HC	Moderna	N	No data	LPS	50	1	1150	0	0	M	121.97	345207
136	F7	C19-221	B+	HC	Moderna	N	No data	LPS	50	2	1073	0	0	M	121.97	345207
136	F9	C19-221	B+	HC	Moderna	N	No data	PHA-P	50	52	1226	17	0	M	121.97	345207
136	F11	C19-221	B+	HC	Moderna	N	No data	PHA-P	50	65	1196	21	0	M	121.97	345207
118	A5	C19-130	B+	HC	Moderna	N	Positive	PMA	50	5	281	0	Caucasian	F	54.4438	390029
118	A8	C19-130	B+	HC	Moderna	N	Positive	IO	50	23	2	0	Caucasian	F	54.4438	390029
118	A11	C19-130	B+	HC	Moderna	N	Positive	No stimulation	50	3	1	0	Caucasian	F	54.4438	390029
118	A2	C19-130	B+	HC	Moderna	N	Positive	LPS	50	5	676	1	Caucasian	F	54.4438	390029
136	B1	C19-100	B+	TR	Pfizer	N	Weak signal	No stimulation	50	2	2	0	Middle Eastern	M	69.7753	522853
136	B3	C19-100	B+	TR	Pfizer	N	Weak signal	No stimulation	50	2	3	0	Middle Eastern	M	69.7753	522853
136	B5	C19-100	B+	TR	Pfizer	N	Weak signal	LPS	50	1	892	0	Middle Eastern	M	69.7753	522853
136	B7	C19-100	B+	TR	Pfizer	N	Weak signal	LPS	50	2	953	0	Middle Eastern	M	69.7753	522853
136	B11	C19-100	B+	TR	Pfizer	N	Weak signal	PHA-P	50	6	297	1	Middle Eastern	M	69.7753	522853
136	B9	C19-100	B+	TR	Pfizer	N	Weak signal	PHA-P	50	7	450	4	Middle Eastern	M	69.7753	522853
154	F9	C19-263	C	TR	Moderna	N	No data	LPS	50	0	0	0	Black or AFA	M	42.9205	72772.1
154	D9	C19-263	C	TR	Moderna	N	No data	LPS	50	1	236	0	Black or AFA	M	42.9205	72772.1
154	E9	C19-263	C	TR	Moderna	N	No data	LPS	50	3	302	0	Black or AFA	M	42.9205	72772.1
136	E7	C19-219	B	HC	Pfizer	N	No data	LPS	50	2	1183	1	Caucasian	M	121.97	34586
154	G7	C19-157	C	TR	Pfizer	N	Negative	PMA	50	0	0	0	Black or AFA	M	69.0274	3952.52
154	C7	C19-157	C	TR	Pfizer	N	Negative	No stimulation	50	0	844	0	Black or AFA	M	69.0274	3952.52
154	B7	C19-157	C	TR	Pfizer	N	Negative	No stimulation	50	6	852	1	Black or AFA	M	69.0274	3952.52
154	A7	C19-157	C	TR	Pfizer	N	Negative	No stimulation	50	6	728	4	Black or AFA	M	69.0274	3952.52
154	H7	C19-157	C	TR	Pfizer	N	Negative	PMA	50	13	1063	10	Black or AFA	M	69.0274	3952.52
154	A3	C19-042	B	TR	Pfizer	N	Negative	No stimulation	50	3	6	0	Hispanic	M	59.2411	4462.49
154	B3	C19-042	B	TR	Pfizer	N	Negative	No stimulation	50	3	9	0	Hispanic	M	59.2411	4462.49
154	C3	C19-042	B	TR	Pfizer	N	Negative	No stimulation	50	2	4	0	Hispanic	M	59.2411	4462.49
154	G3	C19-042	B	TR	Pfizer	N	Negative	PMA	50	1	48	0	Hispanic	M	59.2411	4462.49
154	H3	C19-042	B	TR	Pfizer	N	Negative	PMA	50	1	61	0	Hispanic	M	59.2411	4462.49
136	E5	C19-219	B	HC	Pfizer	N	No data	LPS	50	4	1172	2	Caucasian	M	121.97	34586
118	E2	C19-182	B	HC	Pfizer	N	No data	LPS	50	8	1453	4	Caucasian	M	25.0822	52044.1
118	F2	C19-194	B	TR	Moderna	N	No data	LPS	50	18	1284	11	Caucasian	m	59.1096	326995
124	C1	C19-093	B	TR	Pfizer	N	Weak signal	LPS	50	0	0	0	Caucasian	M	83.074	8821.45
124	C2	C19-093	B	TR	Pfizer	N	Weak signal	LPS	50	2	1196	0	Caucasian	M	83.074	8821.45
154	A2	C19-031	B	TR	Pfizer	N	Negative	No stimulation	50	0	842	0	Black or AFA	M	74.063	11355
154	B2	C19-031	B	TR	Pfizer	N	Negative	No stimulation	50	0	725	0	Black or AFA	M	74.063	11355
154	C2	C19-031	B	TR	Pfizer	N	Negative	No stimulation	50	1	581	0	Black or AFA	M	74.063	11355
154	H2	C19-031	B	TR	Pfizer	N	Negative	PMA	50	1	1000	0	Black or AFA	M	74.063	11355
154	G2	C19-031	B	TR	Pfizer	N	Negative	PMA	50	2	899	1	Black or AFA	M	74.063	11355
154	A5	C19-083	C	TR	Moderna	N	Positive	No stimulation	50	0	50	0	Caucasian	M	51.6055	20596.2
154	B5	C19-083	C	TR	Moderna	N	Positive	No stimulation	50	2	157	0	Caucasian	M	51.6055	20596.2
154	D11	C19-292	C	TR	Pfizer	N	No data	LPS	50	0	0	0	Caucasian	F	50.2932	131410
154	E11	C19-292	C	TR	Pfizer	N	No data	LPS	50	0	0	0	Caucasian	F	50.2932	131410
154	F11	C19-292	C	TR	Pfizer	N	No data	LPS	50	0	0	0	Caucasian	F	50.2932	131410
154	C5	C19-083	C	TR	Moderna	N	Positive	No stimulation	50	5	249	1	Caucasian	M	51.6055	20596.2
154	H5	C19-083	C	TR	Moderna	N	Positive	PMA	50	6	654	1	Caucasian	M	51.6055	20596.2
154	G5	C19-083	C	TR	Moderna	N	Positive	PMA	50	6	891	3	Caucasian	M	51.6055	20596.2
154	A1	C19-024	C	TR	Moderna	N	Negative	No stimulation	50	2	17	0	Caucasian	M	70.7781	59029.6
154	B1	C19-024	C	TR	Moderna	N	Negative	No stimulation	50	3	20	0	Caucasian	M	70.7781	59029.6
154	C1	C19-024	C	TR	Moderna	N	Negative	No stimulation	50	2	20	0	Caucasian	M	70.7781	59029.6
124	H1	C19-292	B	TR	Pfizer	N	No data	LPS	50	3	498	0	Caucasian	F	50.2932	174630
154	D5	C19-083	C	TR	Moderna	N	Positive	LPS	50	3	338	0	Caucasian	M	51.6055	20596.2
154	E5	C19-083	C	TR	Moderna	N	Positive	LPS	50	0	361	0	Caucasian	M	51.6055	20596.2
154	G1	C19-024	C	TR	Moderna	N	Negative	PMA	50	1	53	0	Caucasian	M	70.7781	59029.6
154	H1	C19-024	C	TR	Moderna	N	Negative	PMA	50	4	43	0	Caucasian	M	70.7781	59029.6
118	C11	C19-159	C	HC	Moderna	N	Positive	No stimulation	50	0	789	0	Caucasian	F	49.7178	69509.1
154	F5	C19-083	C	TR	Moderna	N	Positive	LPS	50	0	324	0	Caucasian	M	51.6055	20596.2
118	C5	C19-159	C	HC	Moderna	N	Positive	PMA	50	3	1483	2	Caucasian	F	49.7178	69509.1
118	C8	C19-159	C	HC	Moderna	N	Positive	IO	50	129	1365	44	Caucasian	F	49.7178	69509.1
136	G1	C19-222	B	HC	Covid +	No data	No data	No stimulation	50	4	6	0	0	F	121.97	87105.4
136	G3	C19-222	B	HC	Covid +	No data	No data	No stimulation	50	4	5	0	0	F	121.97	87105.4
136	G5	C19-222	B	HC	Covid +	No data	No data	LPS	50	2	872	0	0	F	121.97	87105.4
136	G7	C19-222	B	HC	Covid +	No data	No data	LPS	50	0	799	0	0	F	121.97	87105.4
136	G11	C19-222	B	HC	Covid +	No data	No data	PHA-P	50	80	866	10	0	F	121.97	87105.4
136	G9	C19-222	B	HC	Covid +	No data	No data	PHA-P	50	70	986	18	0	F	121.97	87105.4
136	H1	C19-223	B+	HC	Johnson & Johnson	N	No data	No stimulation	50	0	18	0	0	M	121.97	95006.6
136	H3	C19-223	B+	HC	Johnson & Johnson	N	No data	No stimulation	50	3	14	0	0	M	121.97	95006.6
136	H7	C19-223	B+	HC	Johnson & Johnson	N	No data	LPS	50	5	806	0	0	M	121.97	95006.6
136	H5	C19-223	B+	HC	Johnson & Johnson	N	No data	LPS	50	3	706	1	0	M	121.97	95006.6
136	H11	C19-223	B+	HC	Johnson & Johnson	N	No data	PHA-P	50	131	929	51	0	M	121.97	95006.6
136	H9	C19-223	B+	HC	Johnson & Johnson	N	No data	PHA-P	50	172	991	62	0	M	121.97	95006.6
154	D12	C19-294	C	TR	Moderna	Y	No data	LPS	50	0	0	0	Caucasian	F	60.2493	124546
154	E12	C19-294	C	TR	Moderna	Y	No data	LPS	50	0	0	0	Caucasian	F	60.2493	124546
154	F12	C19-294	C	TR	Moderna	Y	No data	LPS	50	0	0	0	Caucasian	F	60.2493	124546
154	H12	C19-294	C	TR	Moderna	Y	No data	PMA	50	14	913	8	Caucasian	F	60.2493	124546
154	B12	C19-294	C	TR	Moderna	Y	No data	No stimulation	50	23	783	14	Caucasian	F	60.2493	124546
154	G12	C19-294	C	TR	Moderna	Y	No data	PMA	50	23	863	20	Caucasian	F	60.2493	124546
154	A12	C19-294	C	TR	Moderna	Y	No data	No stimulation	50	30	898	23	Caucasian	F	60.2493	124546
154	C12	C19-294	C	TR	Moderna	Y	No data	No stimulation	50	27	758	25	Caucasian	F	60.2493	124546
154	D1	C19-024	C	TR	Moderna	N	Negative	LPS	50	0	389	0	Caucasian	M	70.7781	59029.6
154	E1	C19-024	C	TR	Moderna	N	Negative	LPS	50	1	414	0	Caucasian	M	70.7781	59029.6
154	F1	C19-024	C	TR	Moderna	N	Negative	LPS	50	4	374	0	Caucasian	M	70.7781	59029.6
154	A11	C19-292	C	TR	Pfizer	N	No data	No stimulation	50	0	26	0	Caucasian	F	50.2932	131410
154	B11	C19-292	C	TR	Pfizer	N	No data	No stimulation	50	2	12	0	Caucasian	F	50.2932	131410
154	C11	C19-292	C	TR	Pfizer	N	No data	No stimulation	50	1	9	0	Caucasian	F	50.2932	131410
154	H11	C19-292	C	TR	Pfizer	N	No data	PMA	50	2	111	0	Caucasian	F	50.2932	131410
154	G11	C19-292	C	TR	Pfizer	N	No data	PMA	50	3	83	1	Caucasian	F	50.2932	131410
136	B2	C19-226	B	HC	Johnson & Johnson	N	No data	No stimulation	50	1	5	0	Caucasian	M	55.3753	171869
136	B4	C19-226	B	HC	Johnson & Johnson	N	No data	No stimulation	50	0	3	0	Caucasian	M	55.3753	171869
136	F2	C19-226	B	HC	Johnson & Johnson	N	No data	No stimulation	50	5	4	0	Caucasian	M	55.3753	171869
136	F4	C19-226	B	HC	Johnson & Johnson	N	No data	No stimulation	50	3	6	0	Caucasian	M	55.3753	171869
136	F6	C19-226	B	HC	Johnson & Johnson	N	No data	LPS	50	3	1098	1	Caucasian	M	55.3753	171869
136	F8	C19-226	B	HC	Johnson & Johnson	N	No data	LPS	50	7	1048	1	Caucasian	M	55.3753	171869
136	B6	C19-226	B	HC	Johnson & Johnson	N	No data	LPS	50	10	1066	2	Caucasian	M	55.3753	171869
136	B8	C19-226	B	HC	Johnson & Johnson	N	No data	LPS	50	10	968	2	Caucasian	M	55.3753	171869
136	F12	C19-226	B	HC	Johnson & Johnson	N	No data	PHA-P	50	75	618	30	Caucasian	M	55.3753	171869
136	F10	C19-226	B	HC	Johnson & Johnson	N	No data	PHA-P	50	89	821	39	Caucasian	M	55.3753	171869
136	B10	C19-226	B	HC	Johnson & Johnson	N	No data	PHA-P	50	105	777	40	Caucasian	M	55.3753	171869
136	B12	C19-226	B	HC	Johnson & Johnson	N	No data	PHA-P	50	137	676	49	Caucasian	M	55.3753	171869
136	A2	C19-225	B, V	HC	Johnson & Johnson	N	No data	No stimulation	50	8	21	0	Caucasian	M	44.5014	207950
136	A4	C19-225	B, V	HC	Johnson & Johnson	N	No data	No stimulation	50	2	13	0	Caucasian	M	44.5014	207950
136	A6	C19-225	B, V	HC	Johnson & Johnson	N	No data	LPS	50	0	1020	0	Caucasian	M	44.5014	207950
136	A8	C19-225	B, V	HC	Johnson & Johnson	N	No data	LPS	50	1	1045	0	Caucasian	M	44.5014	207950
136	E2	C19-225	B, V	HC	Johnson & Johnson	N	No data	No stimulation	50	1	539	0	Caucasian	M	44.5014	207950
136	E6	C19-225	B, V	HC	Johnson & Johnson	N	No data	LPS	50	4	1021	0	Caucasian	M	44.5014	207950
136	E4	C19-225	B, V	HC	Johnson & Johnson	N	No data	No stimulation	50	3	809	1	Caucasian	M	44.5014	207950
136	E8	C19-225	B, V	HC	Johnson & Johnson	N	No data	LPS	50	2	974	1	Caucasian	M	44.5014	207950
136	E10	C19-225	B, V	HC	Johnson & Johnson	N	No data	PHA-P	50	87	1037	32	Caucasian	M	44.5014	207950
136	E12	C19-225	B, V	HC	Johnson & Johnson	N	No data	PHA-P	50	110	1003	37	Caucasian	M	44.5014	207950
136	A10	C19-225	B, V	HC	Johnson & Johnson	N	No data	PHA-P	50	118	1036	43	Caucasian	M	44.5014	207950
136	A12	C19-225	B, V	HC	Johnson & Johnson	N	No data	PHA-P	50	139	1070	56	Caucasian	M	44.5014	207950
154	D6	C19-133	C	TR	No data	No data	Positive	LPS	50	0	0	0	Caucasian	F	66.3507	211268
154	E6	C19-133	C	TR	No data	No data	Positive	LPS	50	0	0	0	Caucasian	F	66.3507	211268
154	F6	C19-133	C	TR	No data	No data	Positive	LPS	50	0	0	0	Caucasian	F	66.3507	211268
154	A6	C19-133	C	TR	No data	No data	Positive	No stimulation	50	2	9	0	Caucasian	F	66.3507	211268
154	B6	C19-133	C	TR	No data	No data	Positive	No stimulation	50	0	22	0	Caucasian	F	66.3507	211268
154	C6	C19-133	C	TR	No data	No data	Positive	No stimulation	50	0	14	0	Caucasian	F	66.3507	211268
154	G6	C19-133	C	TR	No data	No data	Positive	PMA	50	4	32	0	Caucasian	F	66.3507	211268
154	H6	C19-133	C	TR	No data	No data	Positive	PMA	50	4	38	0	Caucasian	F	66.3507	211268
154	D4	C19-052	C	TR	Unknown	No data	Negative	LPS	50	0	0	0	Caucasian	M	43.5918	232711
154	E4	C19-052	C	TR	Unknown	No data	Negative	LPS	50	0	0	0	Caucasian	M	43.5918	232711
154	F4	C19-052	C	TR	Unknown	No data	Negative	LPS	50	0	0	0	Caucasian	M	43.5918	232711
154	A4	C19-052	C	TR	Unknown	No data	Negative	No stimulation	50	2	372	0	Caucasian	M	43.5918	232711
154	B4	C19-052	C	TR	Unknown	No data	Negative	No stimulation	50	3	371	0	Caucasian	M	43.5918	232711
154	C4	C19-052	C	TR	Unknown	No data	Negative	No stimulation	50	2	687	0	Caucasian	M	43.5918	232711
154	H4	C19-052	C	TR	Unknown	No data	Negative	PMA	50	3	595	0	Caucasian	M	43.5918	232711
154	G4	C19-052	C	TR	Unknown	No data	Negative	PMA	50	4	736	1	Caucasian	M	43.5918	232711
118	C2	C19-159	C	HC	Moderna	N	Positive	LPS	50	7	834	1	Caucasian	F	49.7178	69509.1
124	H2	C19-292	B	TR	Pfizer	N	No data	LPS	50	0	432	0	Caucasian	F	50.2932	174630
124	A3	C19-007	C	TR	Pfizer	N	Negative	PMA	50	0	722	0	Black or AFA	M	67.2274	777762
124	A4	C19-007	C	TR	Pfizer	N	Negative	PMA	50	0	187	0	Black or AFA	M	67.2274	777762
124	A5	C19-007	C	TR	Pfizer	N	Negative	IO	50	0	987	0	Black or AFA	M	67.2274	777762
124	A6	C19-007	C	TR	Pfizer	N	Negative	IO	50	0	28	0	Black or AFA	M	67.2274	777762
124	A7	C19-007	C	TR	Pfizer	N	Negative	PHA-P	50	0	748	0	Black or AFA	M	67.2274	777762
124	A8	C19-007	C	TR	Pfizer	N	Negative	PHA-P	50	0	601	0	Black or AFA	M	67.2274	777762
124	A9	C19-007	C	TR	Pfizer	N	Negative	PMA	50	1	986	0	Black or AFA	M	67.2274	777762
124	A10	C19-007	C	TR	Pfizer	N	Negative	PHA-P	50	0	559	0	Black or AFA	M	67.2274	777762
124	A11	C19-007	C	TR	Pfizer	N	Negative	No stimulation	50	0	5	0	Black or AFA	M	67.2274	777762
124	A12	C19-007	C	TR	Pfizer	N	Negative	No stimulation	50	0	2	0	Black or AFA	M	67.2274	777762
154	E8	C19-173	B	TR	Johnson & Johnson	N	Negative	LPS	50	0	0	0	Caucasian	M	57.3425	No data
154	A8	C19-173	B	TR	Johnson & Johnson	N	Negative	No stimulation	50	1	5	0	Caucasian	M	57.3425	No data
154	B8	C19-173	B	TR	Johnson & Johnson	N	Negative	No stimulation	50	4	6	0	Caucasian	M	57.3425	No data
154	C8	C19-173	B	TR	Johnson & Johnson	N	Negative	No stimulation	50	4	2	0	Caucasian	M	57.3425	No data
154	F8	C19-173	B	TR	Johnson & Johnson	N	Negative	LPS	50	0	445	0	Caucasian	M	57.3425	No data
154	G8	C19-173	B	TR	Johnson & Johnson	N	Negative	PMA	50	5	28	0	Caucasian	M	57.3425	No data
154	H8	C19-173	B	TR	Johnson & Johnson	N	Negative	PMA	50	3	19	0	Caucasian	M	57.3425	No data
154	D8	C19-173	B	TR	Johnson & Johnson	N	Negative	LPS	50	3	472	1	Caucasian	M	57.3425	No data
136	C2	C19-229	B+	HC	Pfizer	N	No data	No stimulation	50	4	38	0	Caucasian	F	45.9479	No data
136	C4	C19-229	B+	HC	Pfizer	N	No data	No stimulation	50	5	32	0	Caucasian	F	45.9479	No data
136	C6	C19-229	B+	HC	Pfizer	N	No data	LPS	50	2	848	0	Caucasian	F	45.9479	No data
136	C8	C19-229	B+	HC	Pfizer	N	No data	LPS	50	0	812	0	Caucasian	F	45.9479	No data
136	G2	C19-229	B+	HC	Pfizer	N	No data	No stimulation	50	7	47	0	Caucasian	F	45.9479	No data
136	G4	C19-229	B+	HC	Pfizer	N	No data	No stimulation	50	4	46	0	Caucasian	F	45.9479	No data
136	G6	C19-229	B+	HC	Pfizer	N	No data	LPS	50	0	864	0	Caucasian	F	45.9479	No data
136	G8	C19-229	B+	HC	Pfizer	N	No data	LPS	50	3	780	1	Caucasian	F	45.9479	No data
136	C10	C19-229	B+	HC	Pfizer	N	No data	PHA-P	50	70	919	17	Caucasian	F	45.9479	No data
136	G12	C19-229	B+	HC	Pfizer	N	No data	PHA-P	50	43	760	19	Caucasian	F	45.9479	No data
136	C12	C19-229	B+	HC	Pfizer	N	No data	PHA-P	50	51	760	28	Caucasian	F	45.9479	No data
136	G10	C19-229	B+	HC	Pfizer	N	No data	PHA-P	50	82	951	29	Caucasian	F	45.9479	No data
154	D3	C19-042	B	TR	Pfizer	N	Negative	LPS	50	0	0	0	Hispanic	M	59.2411	4462.49
154	A9	C19-263	C	TR	Moderna	N	No data	No stimulation	50	1	235	0	Black or AFA	M	42.9205	72772.1
154	B9	C19-263	C	TR	Moderna	N	No data	No stimulation	50	1	308	0	Black or AFA	M	42.9205	72772.1
154	C9	C19-263	C	TR	Moderna	N	No data	No stimulation	50	1	327	0	Black or AFA	M	42.9205	72772.1
154	E3	C19-042	B	TR	Pfizer	N	Negative	LPS	50	0	0	0	Hispanic	M	59.2411	4462.49
154	F3	C19-042	B	TR	Pfizer	N	Negative	LPS	50	0	0	0	Hispanic	M	59.2411	4462.49
154	G9	C19-263	C	TR	Moderna	N	No data	PMA	50	6	640	0	Black or AFA	M	42.9205	72772.1
154	H9	C19-263	C	TR	Moderna	N	No data	PMA	50	5	455	0	Black or AFA	M	42.9205	72772.1

## Sheet: elispot il10 and il17
Assay	Well	Patient	Draw	Group	Vaccine	Had_COVID	Stimulation	IL-10 (Red)	IL-17 (Blue, QCd)	DC	Total
169	A1	C19-052	D	TR	Unknown	No data	No stimulation	0	0	0	0
169	A2	C19-052	D	TR	Unknown	No data	No stimulation	1	0	0	1
169	A3	C19-052	D	TR	Unknown	No data	PHA-P	358	21	2	360
169	A4	C19-052	D	TR	Unknown	No data	PHA-P	101	11	0	101
169	B1	C19-062	B	TR	Pfizer	N	No stimulation	0	0	0	0
169	B2	C19-062	B	TR	Pfizer	N	No stimulation	0	0	0	0
169	B3	C19-062	B	TR	Pfizer	N	PHA-P	138	7	0	138
169	B4	C19-062	B	TR	Pfizer	N	PHA-P	17	4	0	17
169	C1	C19-083	B	TR	Moderna	N	No stimulation	2	0	0	2
169	C2	C19-083	B	TR	Moderna	N	No stimulation	4	0	0	4
169	C3	C19-083	B	TR	Moderna	N	PHA-P	319	12	1	320
169	C4	C19-083	B	TR	Moderna	N	PHA-P	139	22	6	145
169	D1	C19-100	BV	TR	Pfizer	N	No stimulation	0	0	0	0
169	D2	C19-100	BV	TR	Pfizer	N	No stimulation	2	1	0	2
169	D3	C19-100	BV	TR	Pfizer	N	PHA-P	713	42	8	721
169	D4	C19-100	BV	TR	Pfizer	N	PHA-P	738	42	14	752
169	E1	C19-253	C	TR	Moderna	N	No stimulation	1	0	0	1
169	E2	C19-253	C	TR	Moderna	N	No stimulation	0	0	0	0
169	E3	C19-253	C	TR	Moderna	N	PHA-P	834	90	12	846
169	E4	C19-253	C	TR	Moderna	N	PHA-P	336	28	3	339
169	F1	C19-263	C	TR	Moderna	N	No stimulation	0	0	0	0
169	F2	C19-263	C	TR	Moderna	N	No stimulation	0	0	0	0
169	F3	C19-263	C	TR	Moderna	N	PHA-P	823	110	15	838
169	F4	C19-263	C	TR	Moderna	N	PHA-P	395	55	4	399
169	G1	C19-278	B	TR	Moderna	N	No stimulation	3	0	0	3
169	G2	C19-278	B	TR	Moderna	N	No stimulation	7	0	0	7
169	G3	C19-278	B	TR	Moderna	N	PHA-P	0	0	0	0
169	G4	C19-278	B	TR	Moderna	N	PHA-P	0	0	0	0
169	H1	C19-291	C	TR	Pfizer	N	No stimulation	0	0	0	0
169	H2	C19-291	C	TR	Pfizer	N	No stimulation	0	0	0	0
169	H3	C19-291	C	TR	Pfizer	N	PHA-P	0	0	0	0
169	H4	C19-291	C	TR	Pfizer	N	PHA-P	0	0	0	0
172	A1	C19-136	C Plus	TR	No data	No data	No stimulation	2	0	0	2
172	B1	C19-136	C Plus	TR	No data	No data	No stimulation	6	0	0	6
172	C1	C19-237	C Plus	TR	Moderna	N	No stimulation	2	0	0	2
172	D1	C19-237	C Plus	TR	Moderna	N	No stimulation	4	0	0	4
172	E1	C19-136	C Plus	TR	No data	No data	PHA-P	492	37	5	497
172	F1	C19-136	C Plus	TR	No data	No data	PHA-P	748	33	3	751
172	G1	C19-237	C Plus	TR	Moderna	N	PHA-P	1317	64	32	1349
172	H1	C19-237	C Plus	TR	Moderna	N	PHA-P	1209	16	14	1223
175	A1	C19-007	D	TR	Pfizer	N	No stimulation	0	0	0	0
175	A2	C19-007	D	TR	Pfizer	N	No stimulation	0	0	0	0
175	A3	C19-007	D	TR	Pfizer	N	PHA-P	42	58	0	42
175	A4	C19-007	D	TR	Pfizer	N	PHA-P	46	66	0	46
175	A5	C19-007	D	TR	Pfizer	N	PHA-P	32	54	1	33
175	B1	C19-073	B	TR	Moderna	N	No stimulation	0	0	0	0
175	B2	C19-073	B	TR	Moderna	N	No stimulation	0	0	0	0
175	B3	C19-073	B	TR	Moderna	N	PHA-P	27	16	0	27
175	B4	C19-073	B	TR	Moderna	N	PHA-P	15	16	0	15
175	B5	C19-073	B	TR	Moderna	N	PHA-P	9	9	0	9
175	C1	C19-091	B	TR	Pfizer	N	No stimulation	0	0	0	0
175	C2	C19-091	B	TR	Pfizer	N	No stimulation	0	0	0	0
175	C3	C19-091	B	TR	Pfizer	N	PHA-P	97	68	3	100
175	C4	C19-091	B	TR	Pfizer	N	PHA-P	105	71	4	109
175	C5	C19-091	B	TR	Pfizer	N	PHA-P	60	32	1	61
175	D1	C19-125	C	TR	Moderna	N	No stimulation	0	0	0	0
175	D2	C19-125	C	TR	Moderna	N	No stimulation	0	0	0	0
175	D3	C19-125	C	TR	Moderna	N	PHA-P	149	18	1	150
175	D4	C19-125	C	TR	Moderna	N	PHA-P	171	18	1	172
175	D5	C19-125	C	TR	Moderna	N	PHA-P	116	24	0	116
175	E1	C19-135	C	TR	Pfizer	N	No stimulation	0	0	0	0
175	E2	C19-135	C	TR	Pfizer	N	No stimulation	0	0	0	0
175	E3	C19-135	C	TR	Pfizer	N	PHA-P	12	6	0	12
175	E4	C19-135	C	TR	Pfizer	N	PHA-P	13	5	0	13
175	E5	C19-135	C	TR	Pfizer	N	PHA-P	11	4	0	11
175	F1	C19-194	C	TR	Moderna	N	No stimulation	0	0	0	0
175	F2	C19-194	C	TR	Moderna	N	No stimulation	0	0	0	0
175	F3	C19-194	C	TR	Moderna	N	PHA-P	115	85	3	118
175	F4	C19-194	C	TR	Moderna	N	PHA-P	132	104	5	137
175	F5	C19-194	C	TR	Moderna	N	PHA-P	104	71	8	112
175	G1	C19-195	B	TR	Moderna	N	No stimulation	0	0	0	0
175	G2	C19-195	B	TR	Moderna	N	No stimulation	0	0	0	0
175	G3	C19-195	B	TR	Moderna	N	PHA-P	4	9	0	4
175	G4	C19-195	B	TR	Moderna	N	PHA-P	7	14	0	7
175	G5	C19-195	B	TR	Moderna	N	PHA-P	2	4	0	2
175	H1	C19-195	B	TR	Moderna	N	No stimulation	0	0	0	0
175	H2	C19-195	B	TR	Moderna	N	No stimulation	0	0	0	0
175	H3	C19-195	B	TR	Moderna	N	PHA-P	5	8	0	5
175	H4	C19-195	B	TR	Moderna	N	PHA-P	6	4	0	6
175	H5	C19-195	B	TR	Moderna	N	PHA-P	3	7	0	3
